# Supplementary material
Source: ML conference proceedings conference paper supplement (https://openreview.net/forum?id=4VfPLTqdrq)

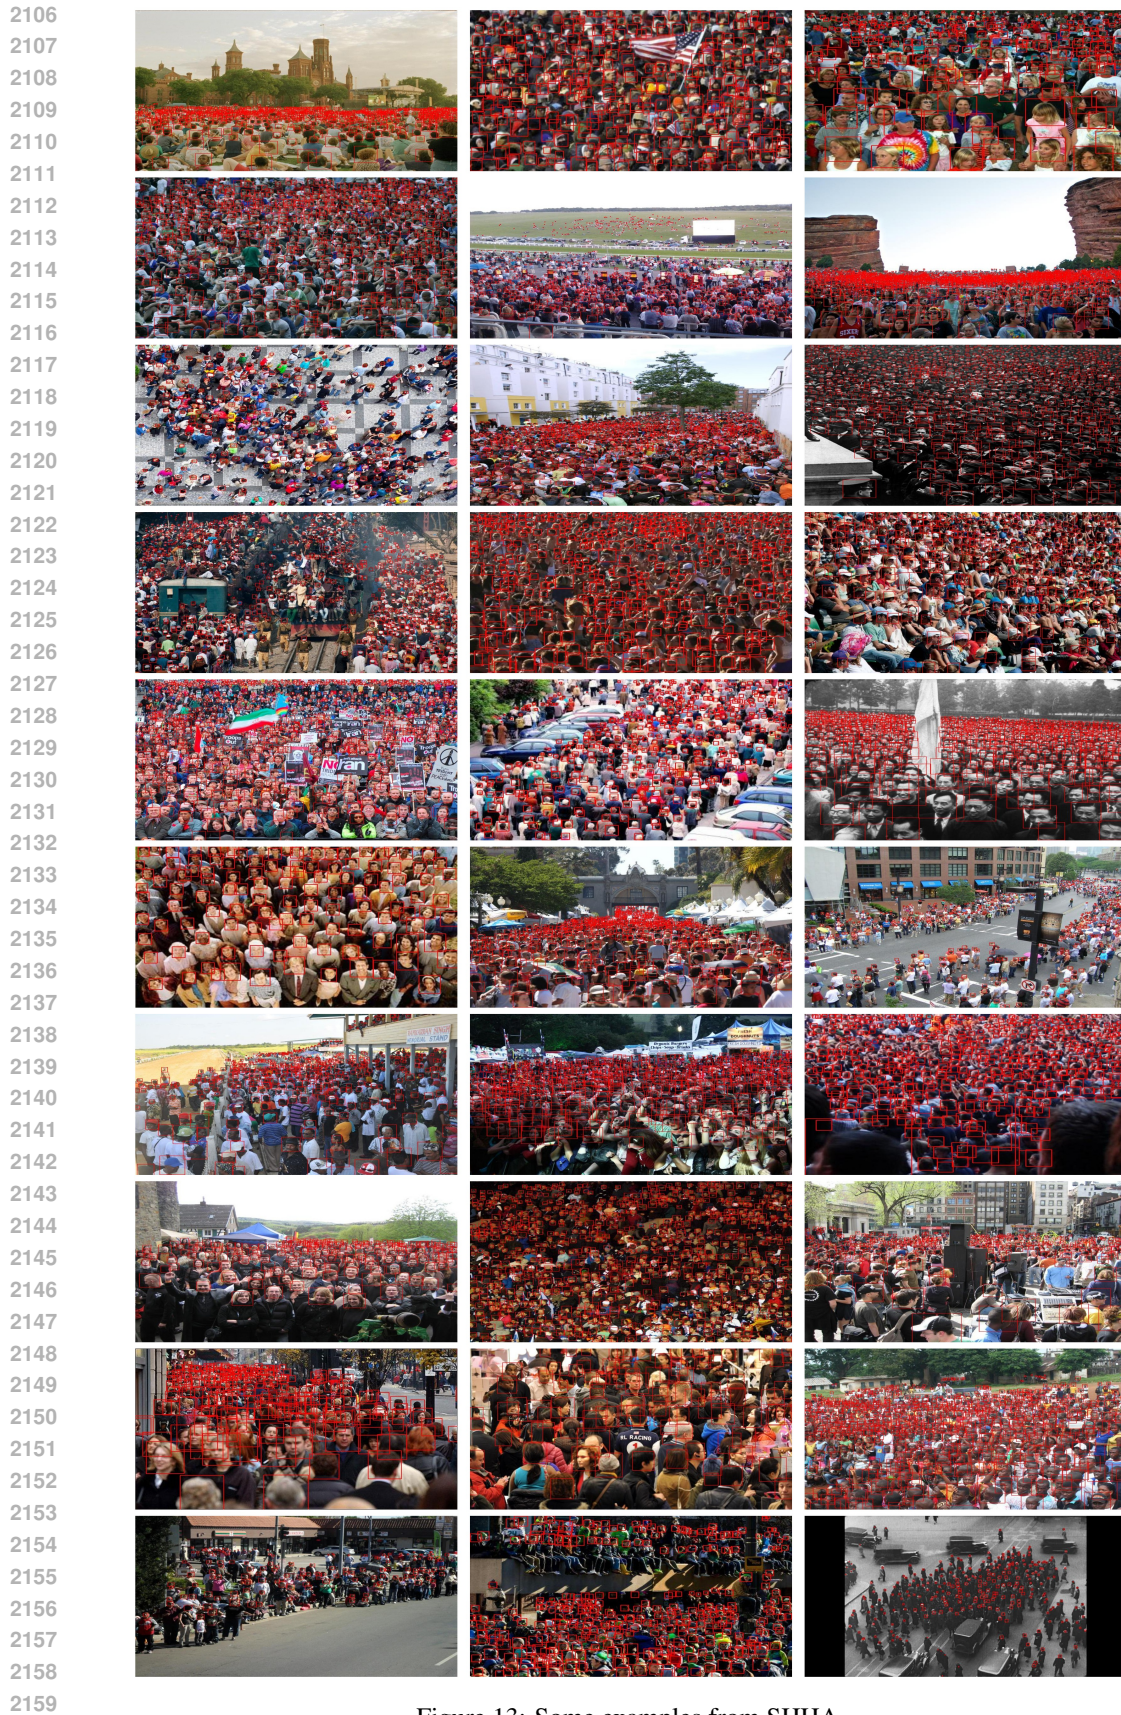

Figure 13: Some examples from SHHA.

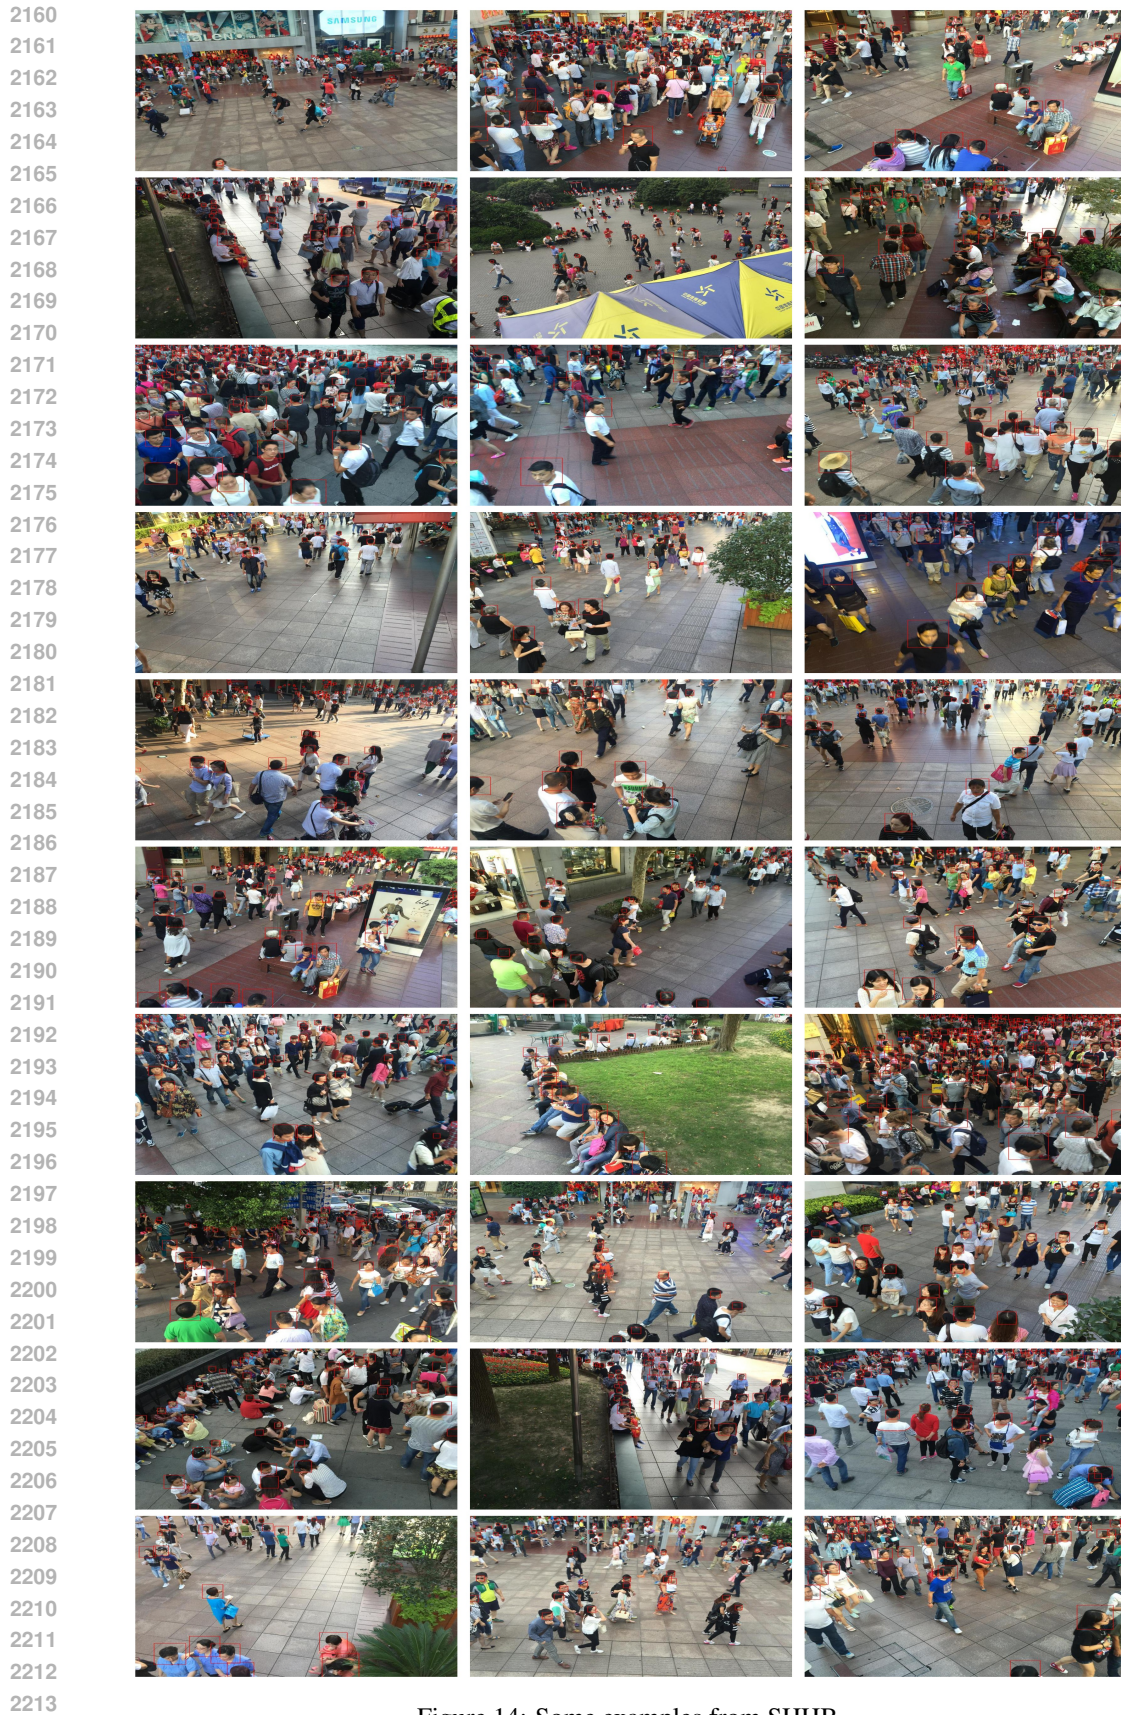

Figure 14: Some examples from SHHB.

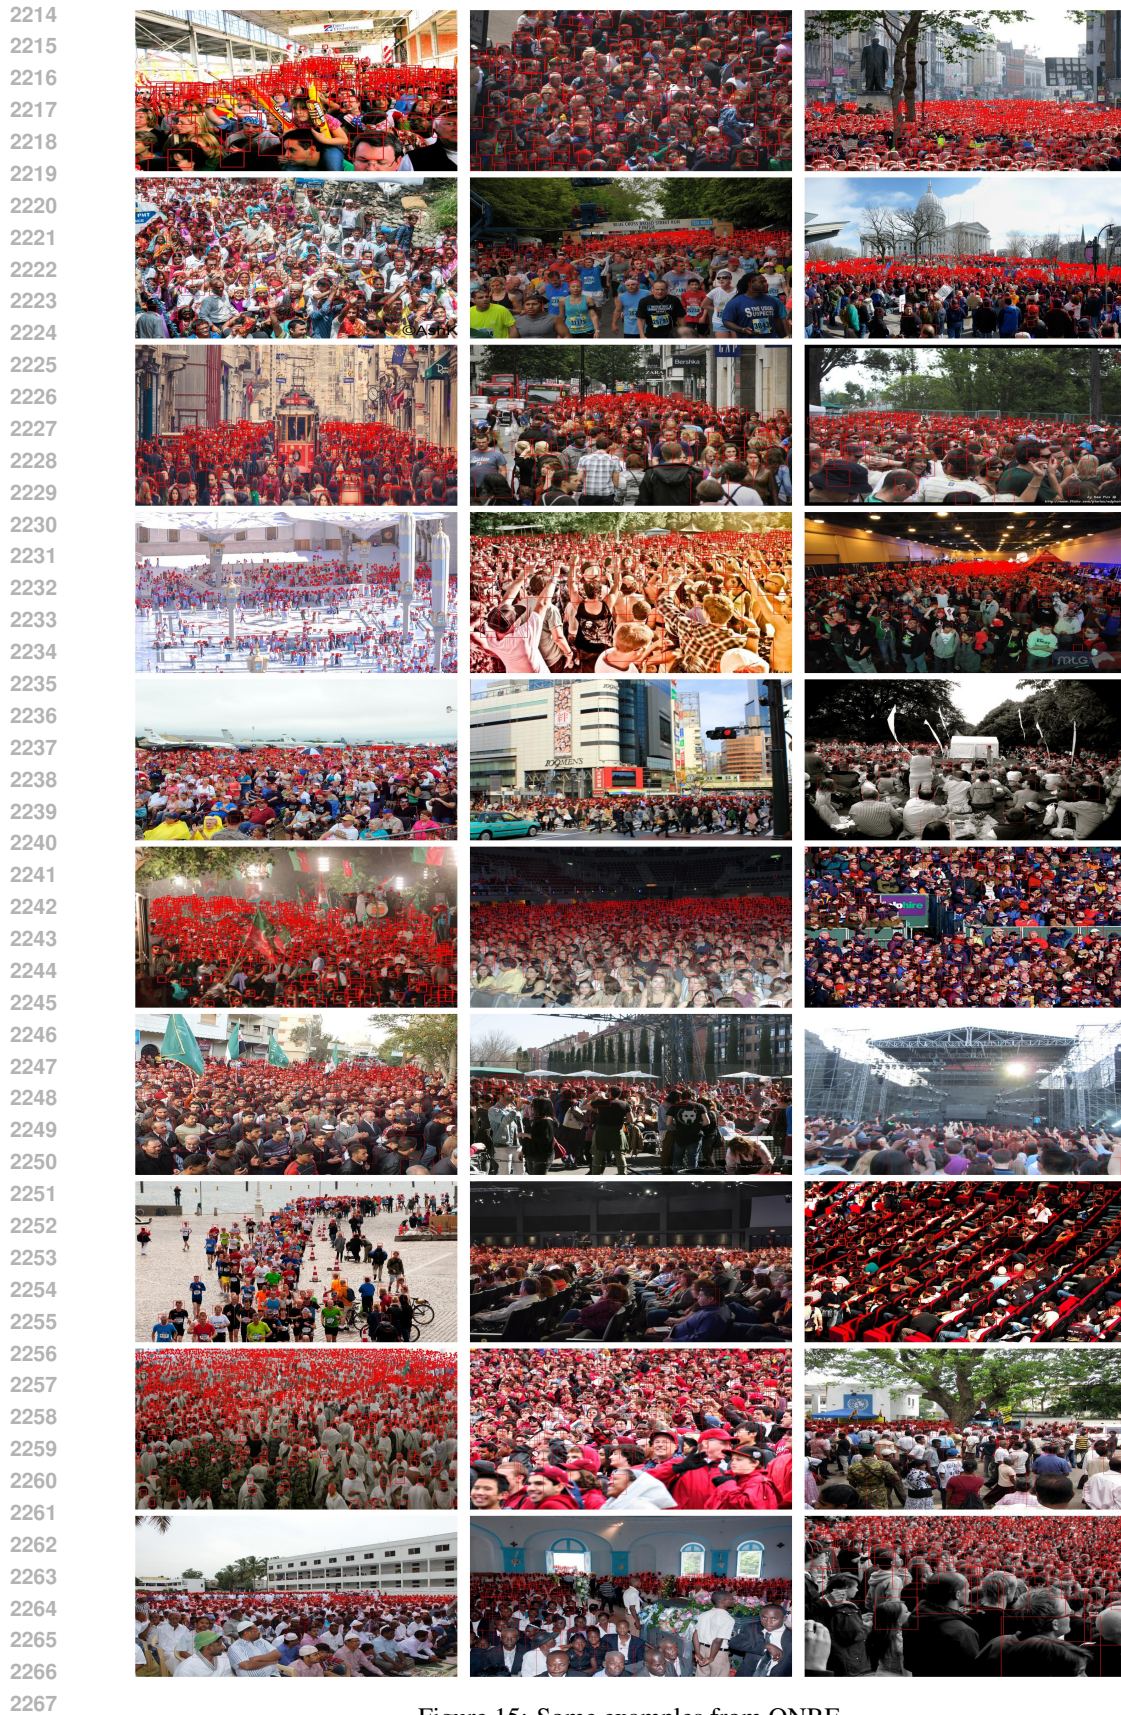

Supplement: supplementary_material [file attachment]
